# Supplementary material for: Diverse and efficient catalytic applications of new cockscomb flower-like Fe3O4@SiO2@KCC-1@MPTMS@CuIImesoporous nanocomposite in the environmentally benign reduction and reductive acetylation of nitroarenes and one-pot synthesis of some coumarin compounds
Source: Royal Society of Chemistry journal article supplement (doi:10.1039/d1ra08763k), 2022-01-01

# Supplementary Information

**Diverse and efficient catalytic applications of new cockscomb flower-like  $\text{Fe}_3\text{O}_4@\text{SiO}_2@\text{KCC-1}@\text{MPTMS}@\text{Cu}^{\text{II}}$  mesoporous nanocomposite in the environmentally benign reduction and reductive acetylation of nitroarenes and one-pot synthesis of some coumarin compounds**

Morteza Hasanpour Galehban, Behzad Zeynizadeh, and Hossein Mousavi\*

Department of Organic Chemistry, Faculty of Chemistry, Urmia University, Urmia, Iran

E-mail: [1hossein.mousavi@gmail.com](mailto:1hossein.mousavi@gmail.com)

## S1. Selected spectral data

### S1.1. FT-IR spectrum of aniline

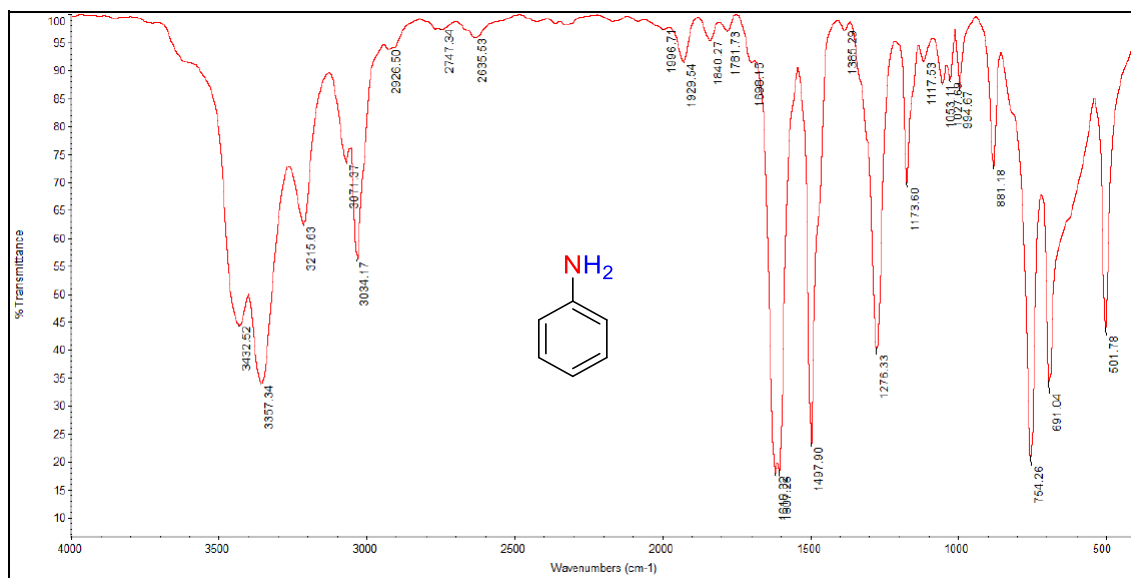

### S1.2. <sup>1</sup>H NMR (300 MHz) spectrum of aniline

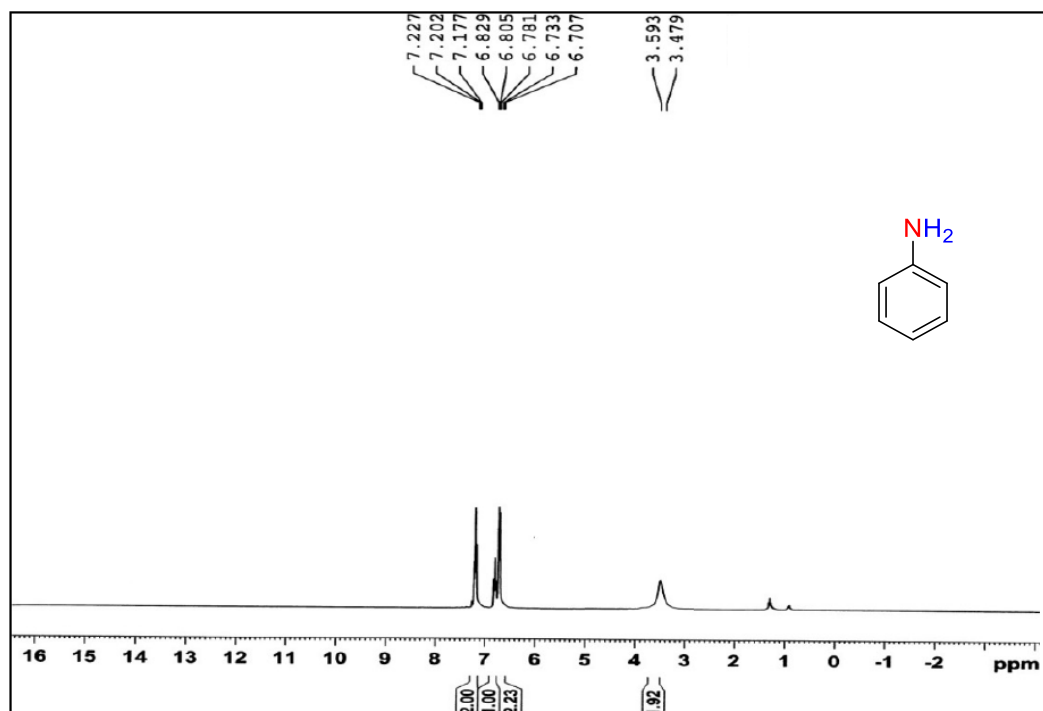

### S1.3. FT-IR spectrum of *p*-aminoaniline

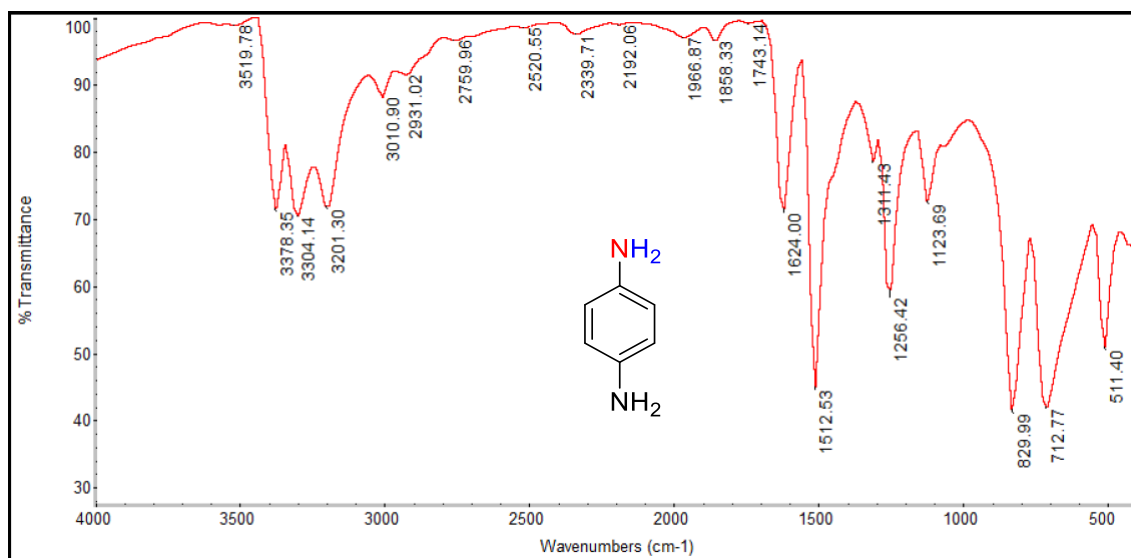

### S1.4. <sup>1</sup>H NMR (300 MHz) spectrum of *p*-aminoaniline

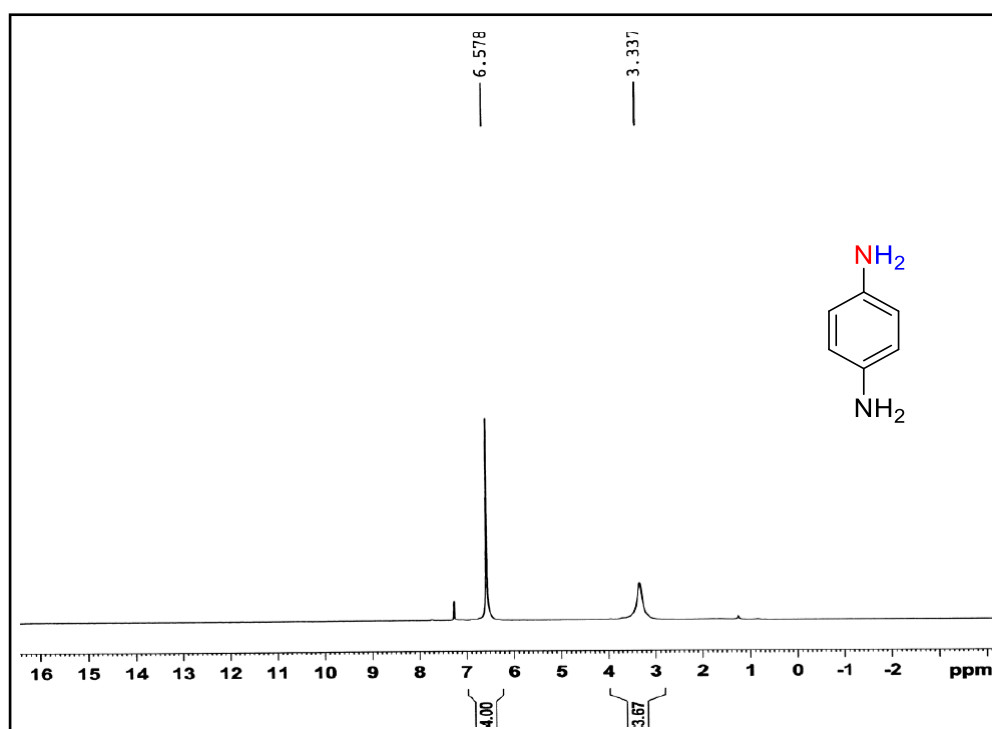

### S1.5. FT-IR spectrum of *p*-(1-hydroxyethyl)aniline

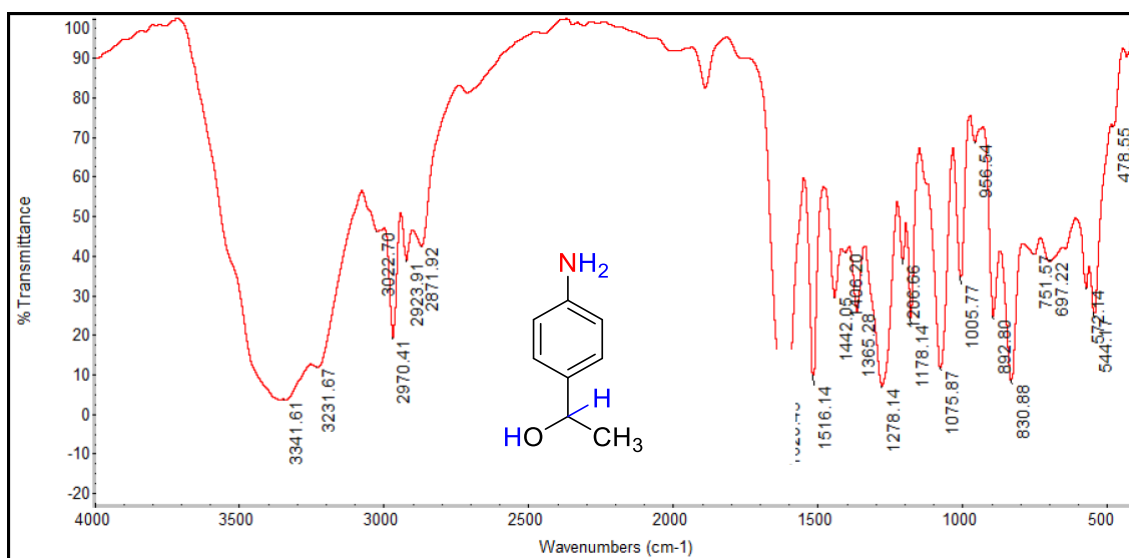

### S1.6. <sup>1</sup>H NMR (300 MHz) spectrum of *p*-(1-hydroxyethyl)aniline

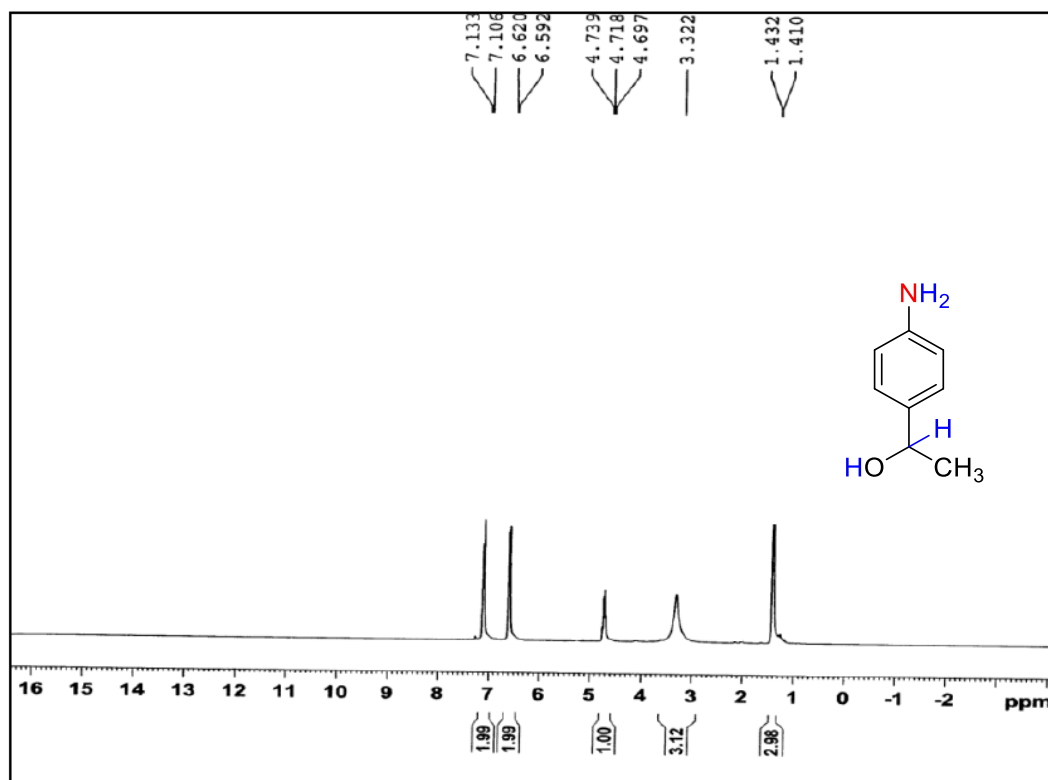

### S1.7. FT-IR spectrum of acetanilide

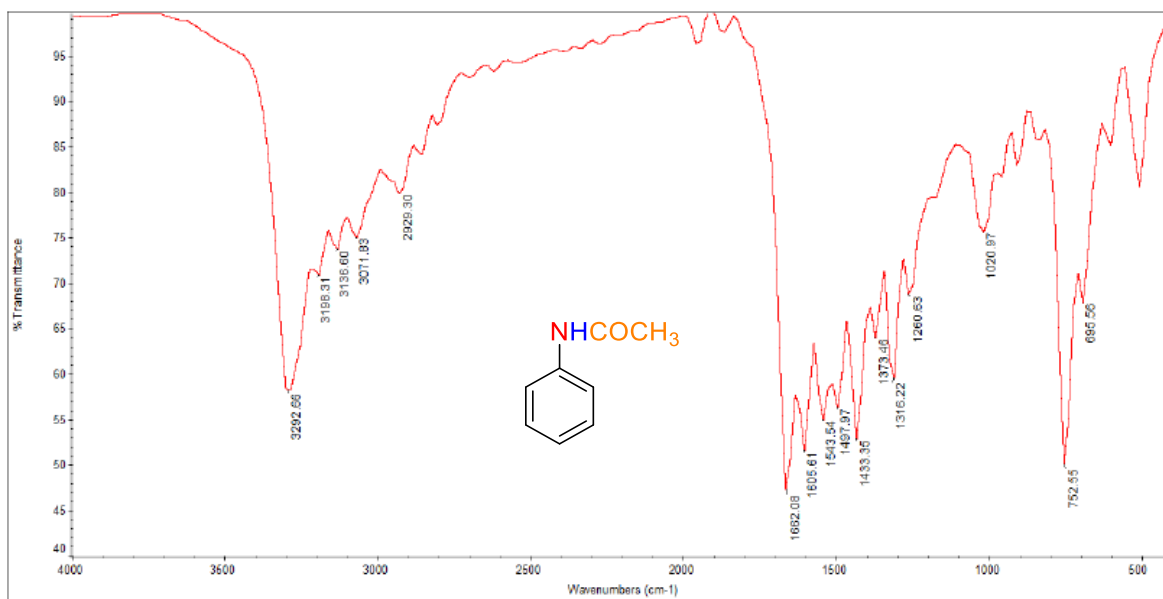

### S1.8. $^1\text{H}$ NMR (300 MHz) spectrum of acetanilide

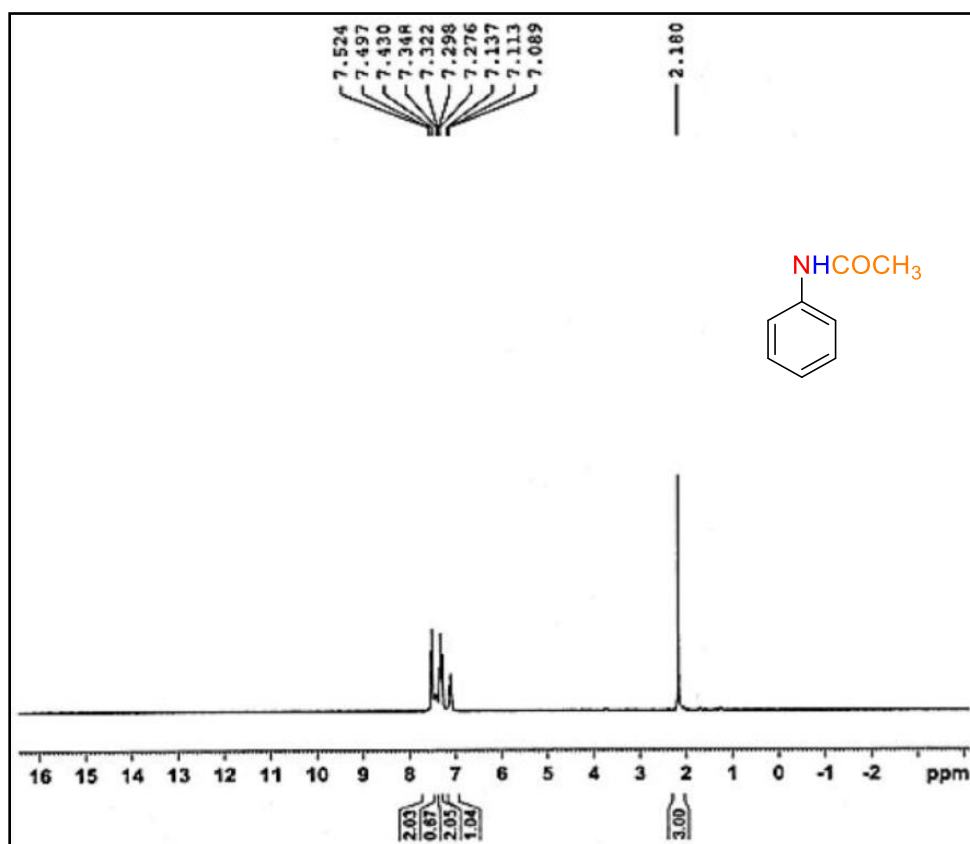

### S1.9. FT-IR spectrum of 3,3'-(phenylmethylene)bis(4-hydroxy-2H-chromen-2-one)

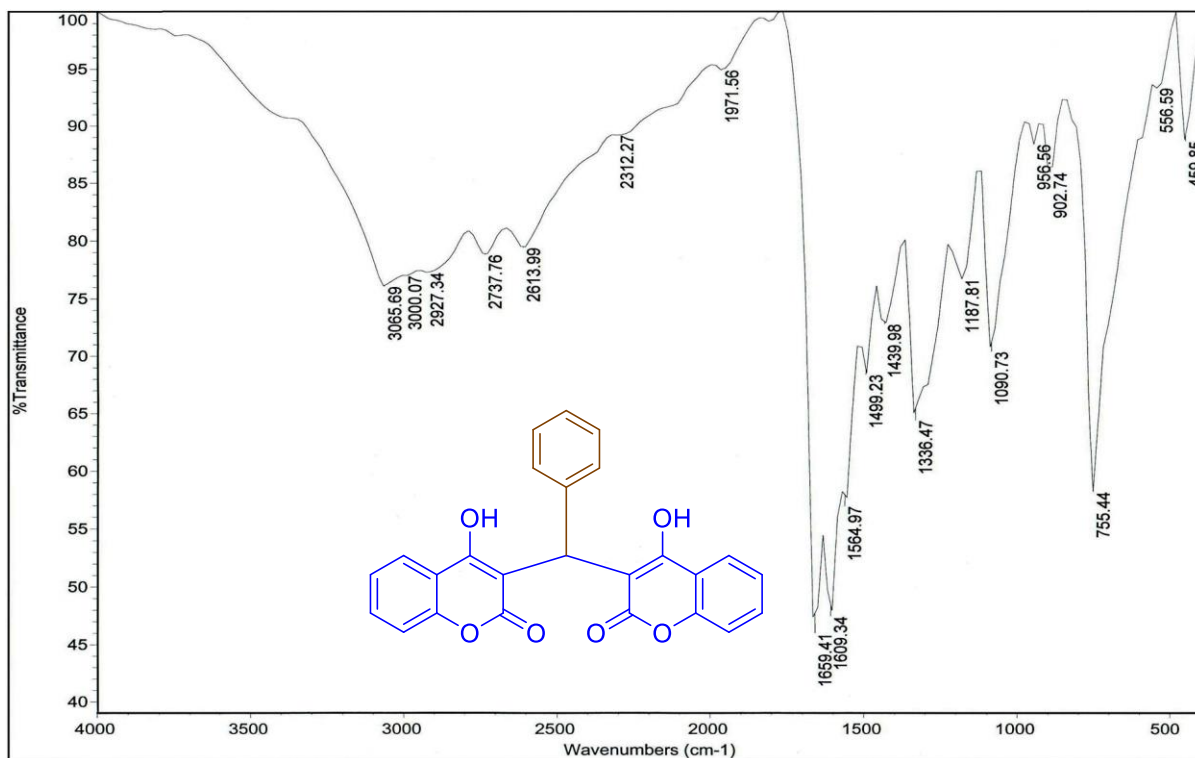

### S1.10. <sup>1</sup>H NMR (300 MHz) spectrum of 3,3'-(phenylmethylene)bis(4-hydroxy-2H-chromen-2-one)

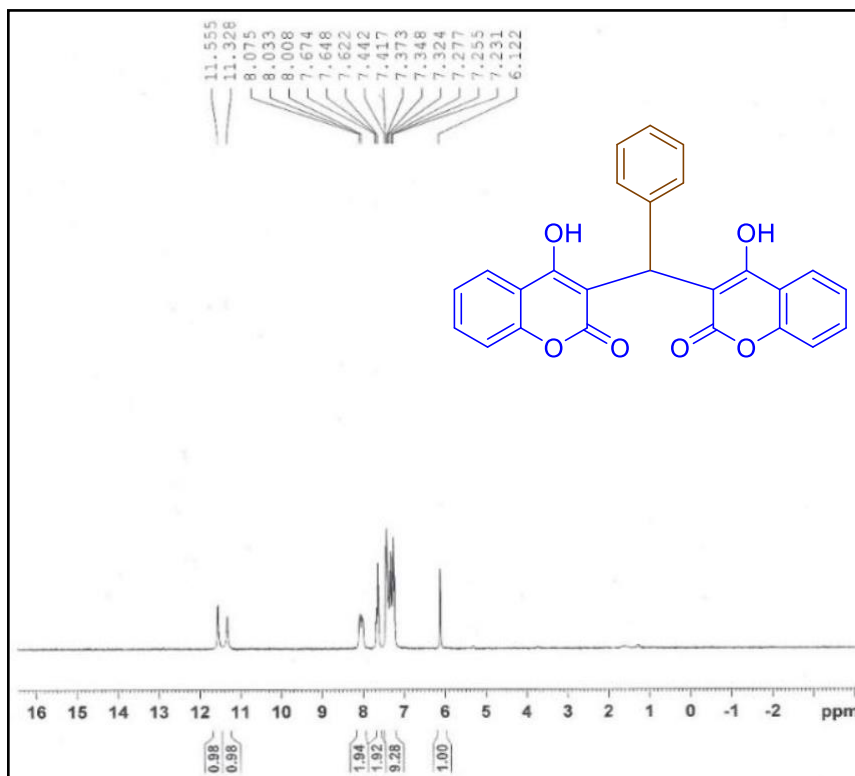

**S1.11. FT-IR spectrum of 3,3'-((4-chlorophenyl)methylene)bis(4-hydroxy-2H-chromen-2-one)**

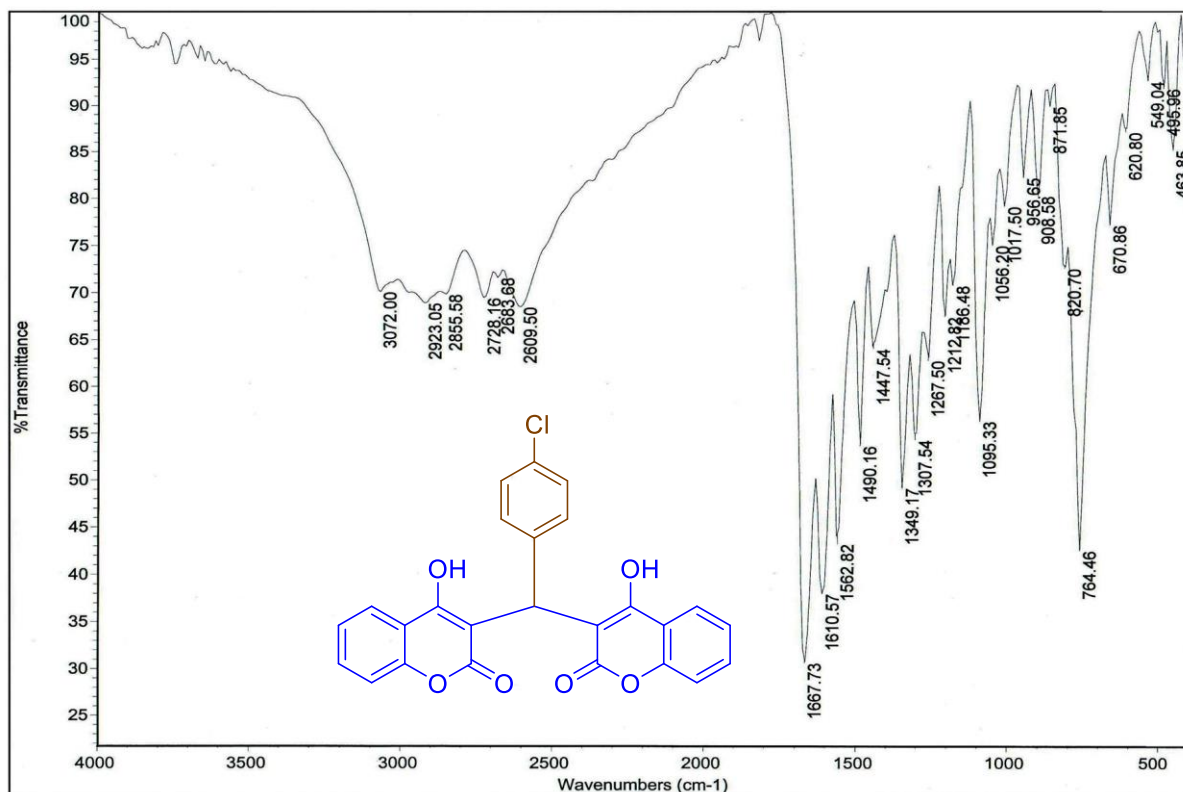

**S1.12. <sup>1</sup>H NMR (300 MHz) spectrum of 3,3'-((4-chlorophenyl)methylene)bis(4-hydroxy-2H-chromen-2-one)**

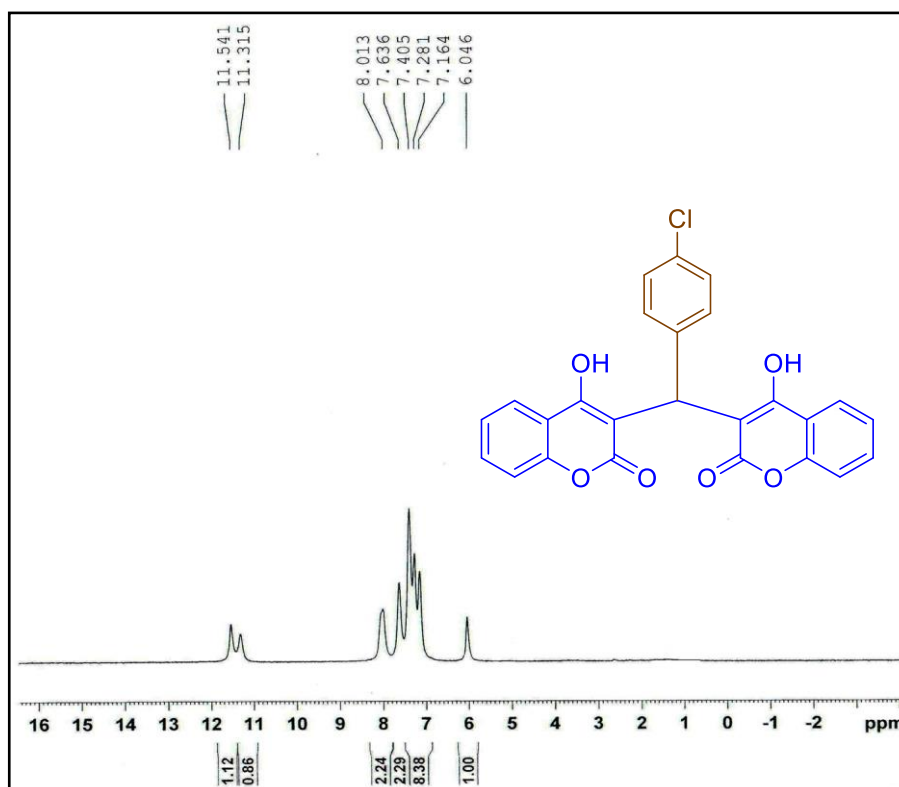

**S1.13. FT-IR spectrum of 3,3'-((4-nitrophenyl)methylene)bis(4-hydroxy-2H-chromen-2-one)**

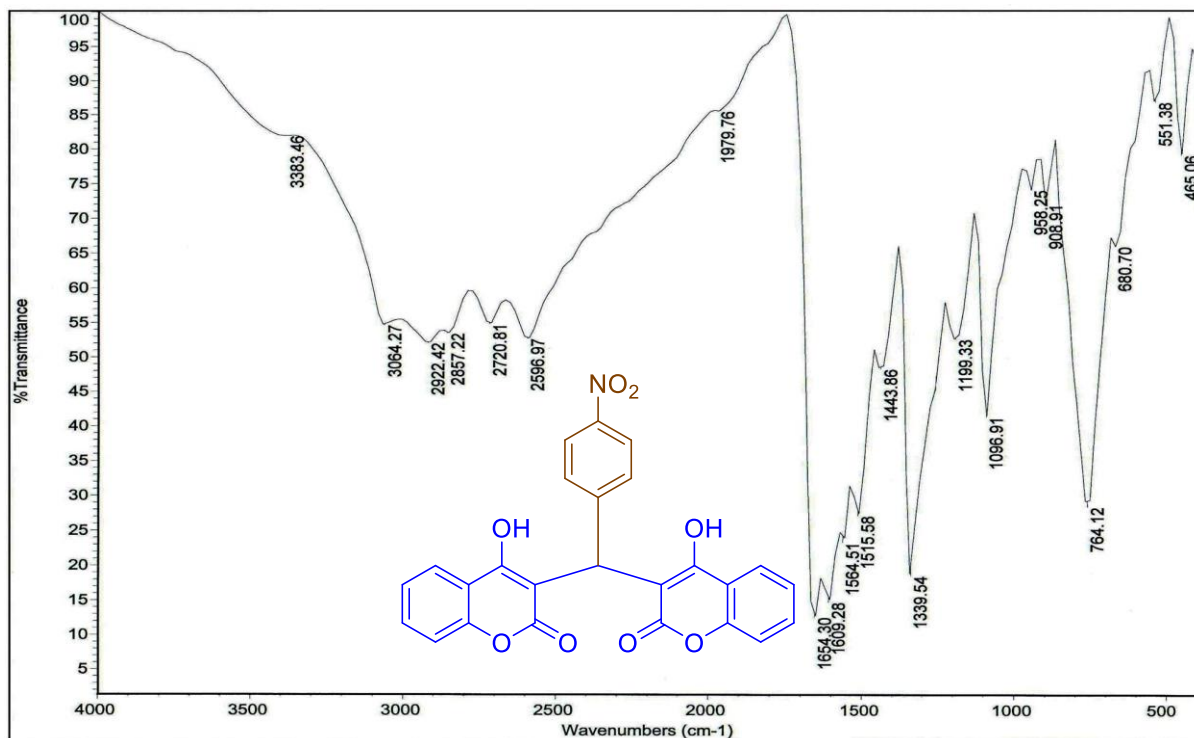

**S1.14. <sup>1</sup>H NMR (300 MHz) spectrum of 3,3'-((4-nitrophenyl)methylene)bis(4-hydroxy-2H-chromen-2-one)**

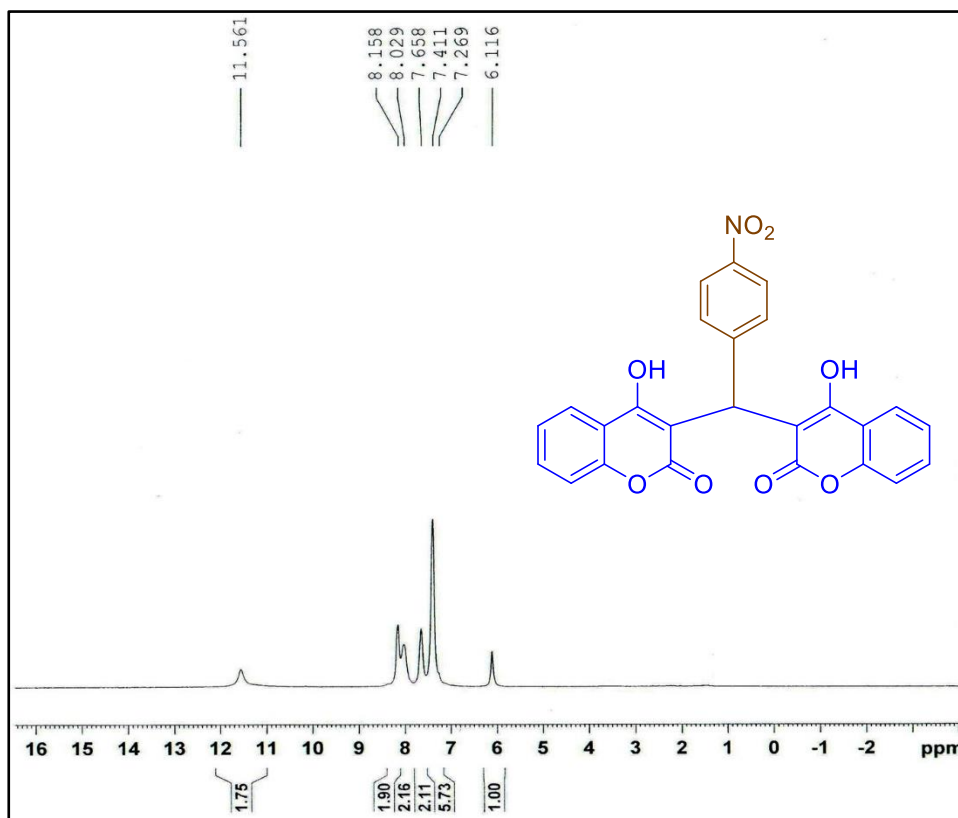



S1.15. FT-IR spectrum of 3,3'-(*p*-tolylmethylene)bis(4-hydroxy-2*H*-chromen-2-one)

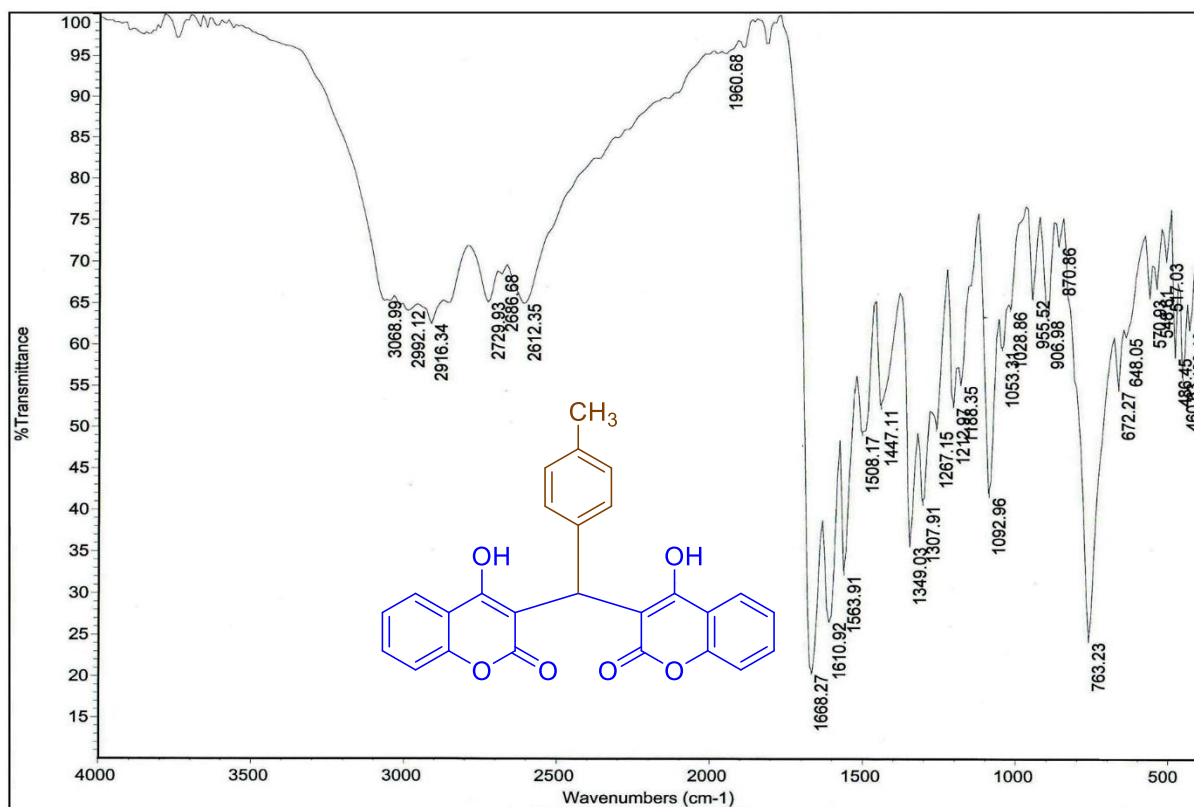

S1.16. <sup>1</sup>H NMR (300 MHz) spectrum of 3,3'-(*p*-tolylmethylene)bis(4-hydroxy-2*H*-chromen-2-one)

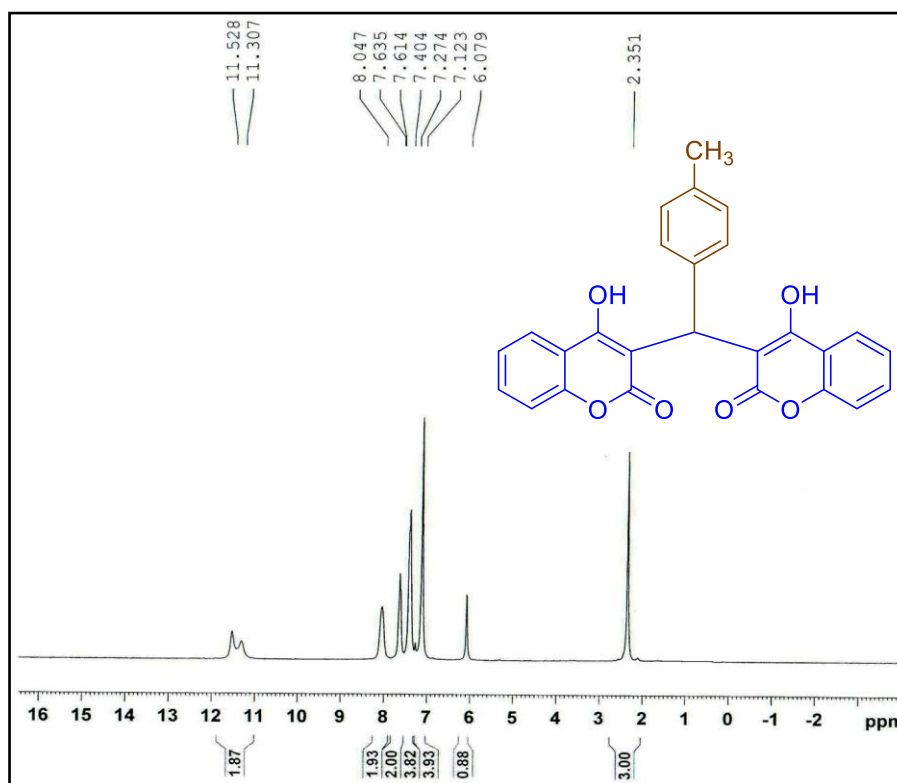

**S1.17. FT-IR spectrum of 3,3'-((4-methoxyphenyl)methylene)bis(4-hydroxy-2H-chromen-2-one)**

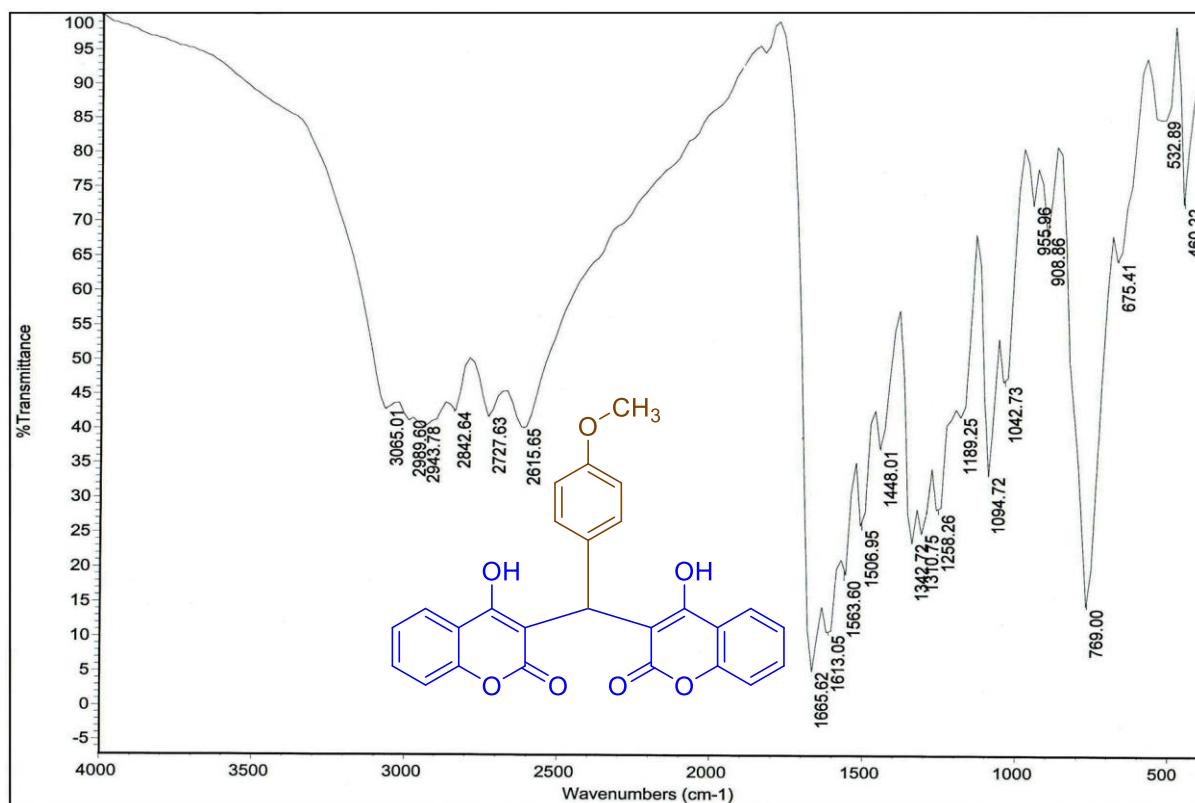

**S1.18. <sup>1</sup>H NMR (300 MHz) spectrum of 3,3'-((4-methoxyphenyl)methylene)bis(4-hydroxy-2H-chromen-2-one)**

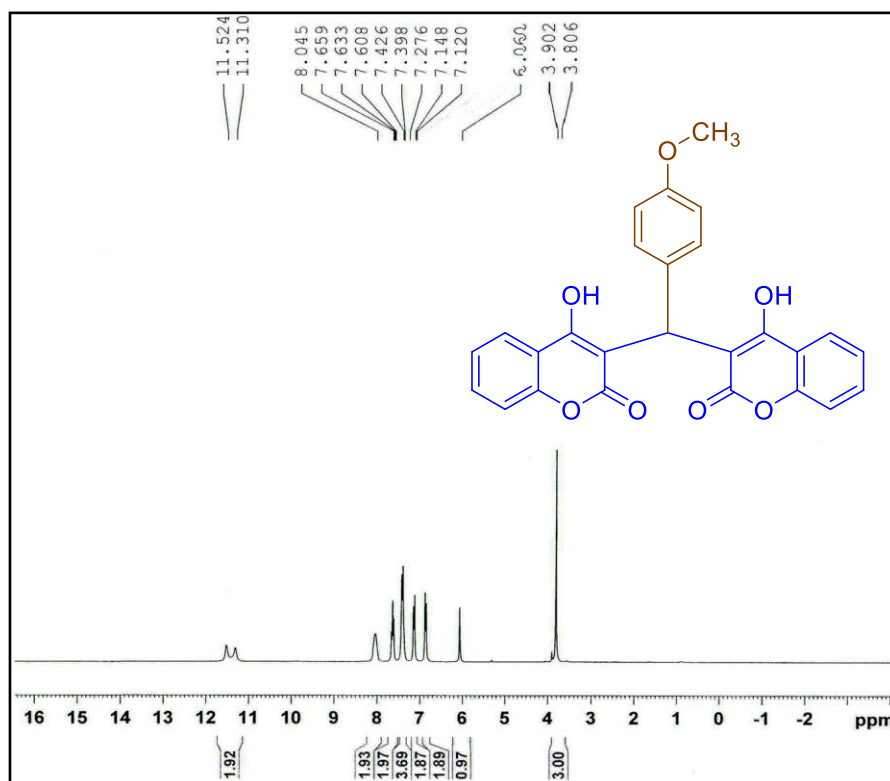

**S1.19. FT-IR spectrum of 2-amino-7,7-dimethyl-5-oxo-4-phenyl-5,6,7,8-tetrahydro-4H-chromene-3-carbonitrile**

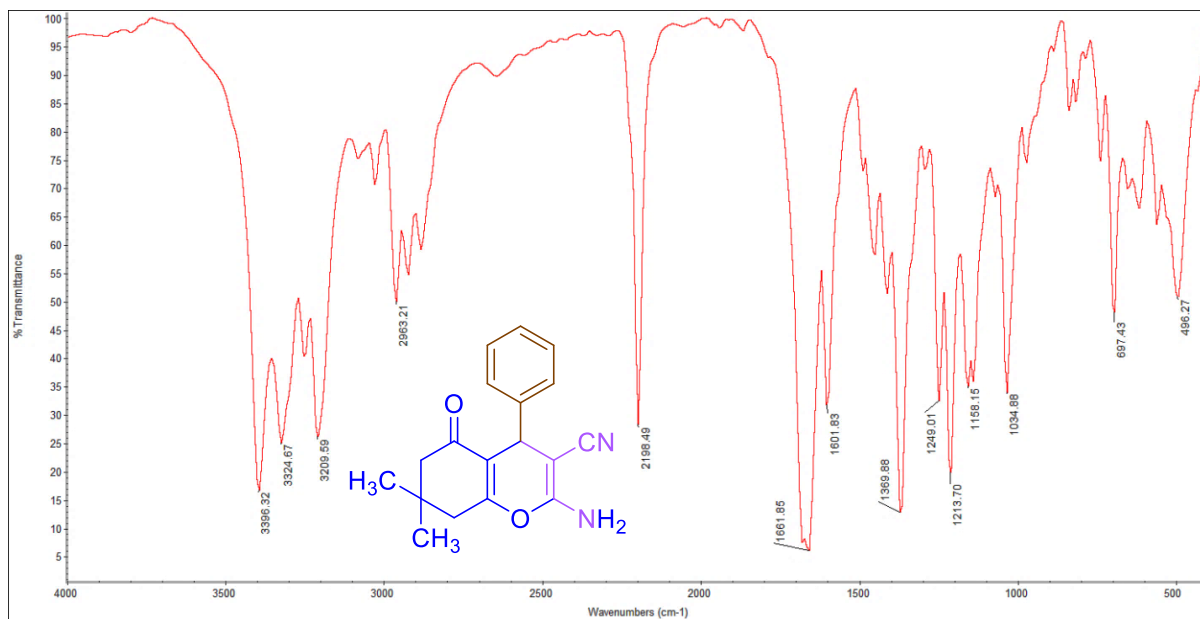

**S1.20. <sup>1</sup>H NMR (400 MHz) spectrum of 2-amino-7,7-dimethyl-5-oxo-4-phenyl-5,6,7,8-tetrahydro-4H-chromene-3-carbonitrile**

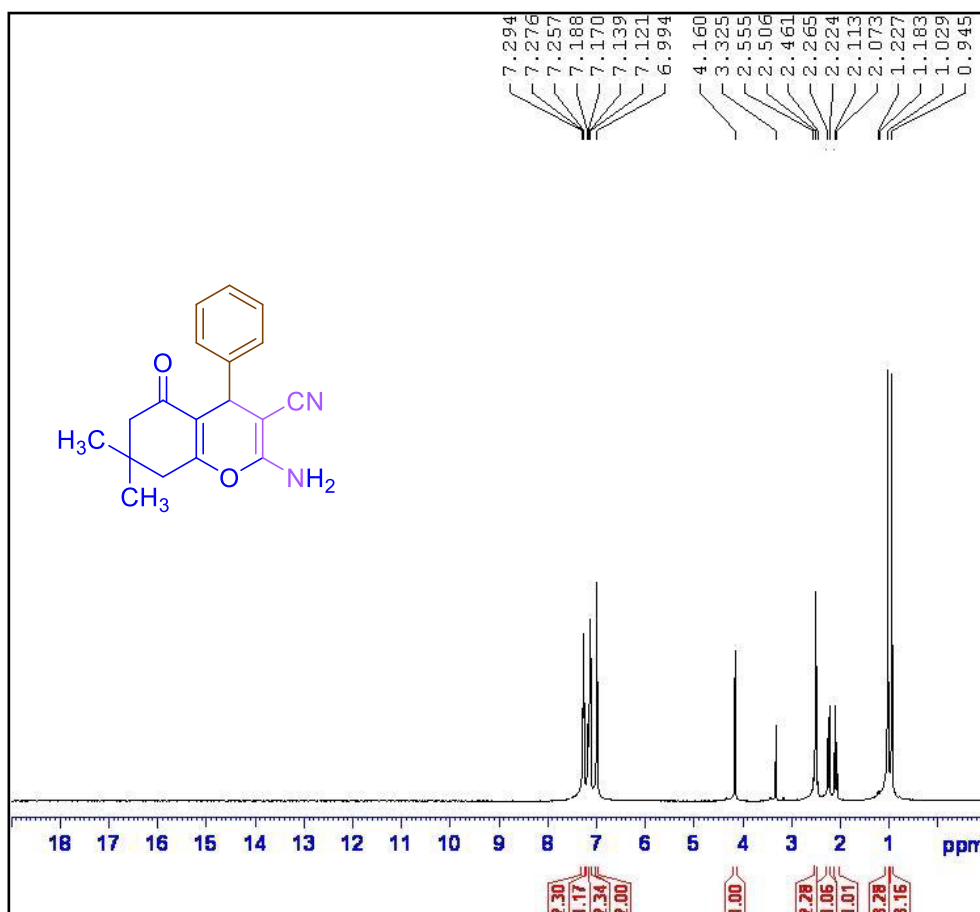

**S1.21. FT-IR spectrum of 2-amino-4-(4-chlorophenyl)-7,7-dimethyl-5-oxo-5,6,7,8-tetrahydro-4H-chromene-3-carbonitrile**

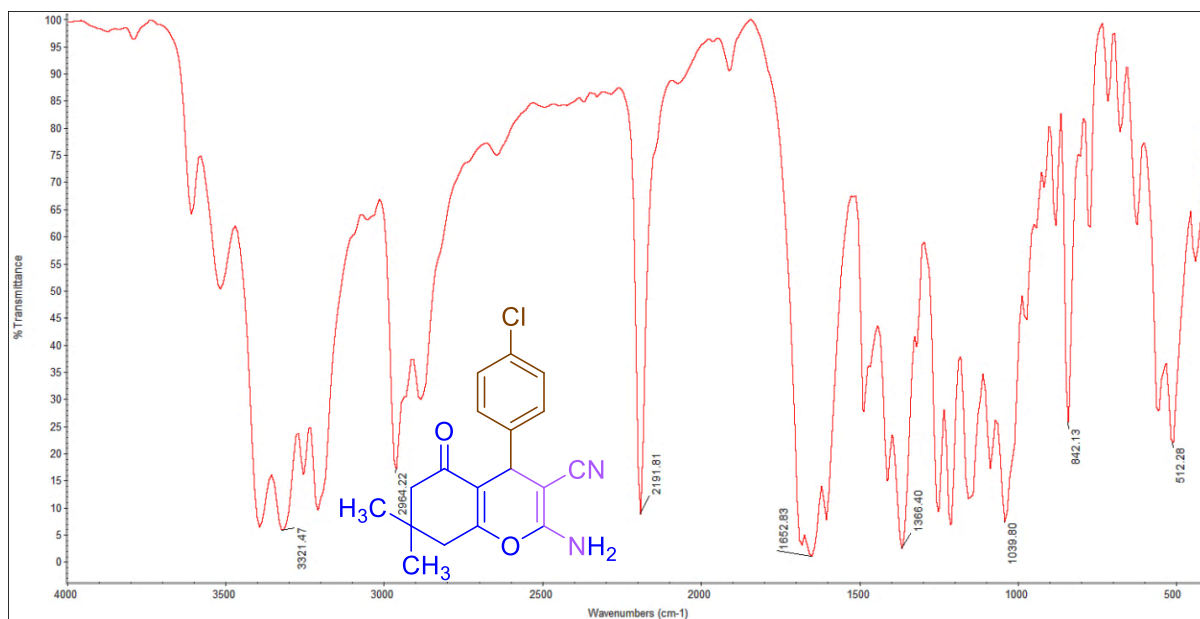

**S1.22. <sup>1</sup>H NMR (400 MHz) spectrum of 2-amino-4-(4-chlorophenyl)-7,7-dimethyl-5-oxo-5,6,7,8-tetrahydro-4H-chromene-3-carbonitrile**

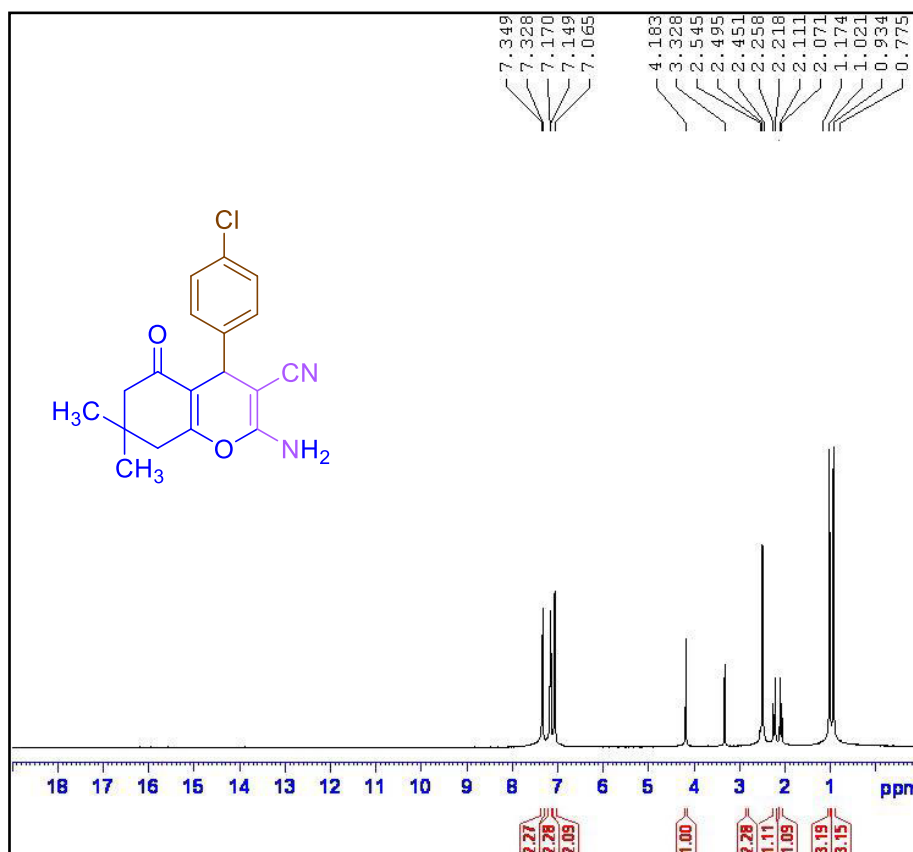

**S1.23. FT-IR spectrum of 2-amino-7,7-dimethyl-4-(4-nitrophenyl)-5-oxo-5,6,7,8-tetrahydro-4H-chromene-3-carbonitrile**

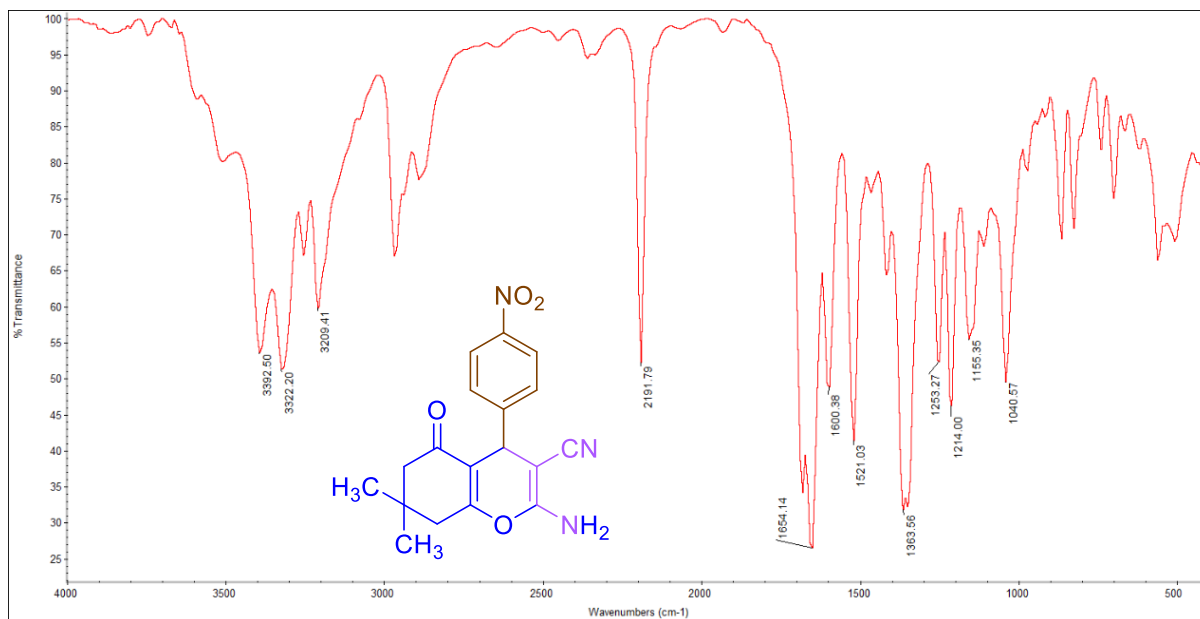

**S1.24. <sup>1</sup>H NMR (400 MHz) spectrum of 2-amino-7,7-dimethyl-4-(4-nitrophenyl)-5-oxo-5,6,7,8-tetrahydro-4H-chromene-3-carbonitrile**

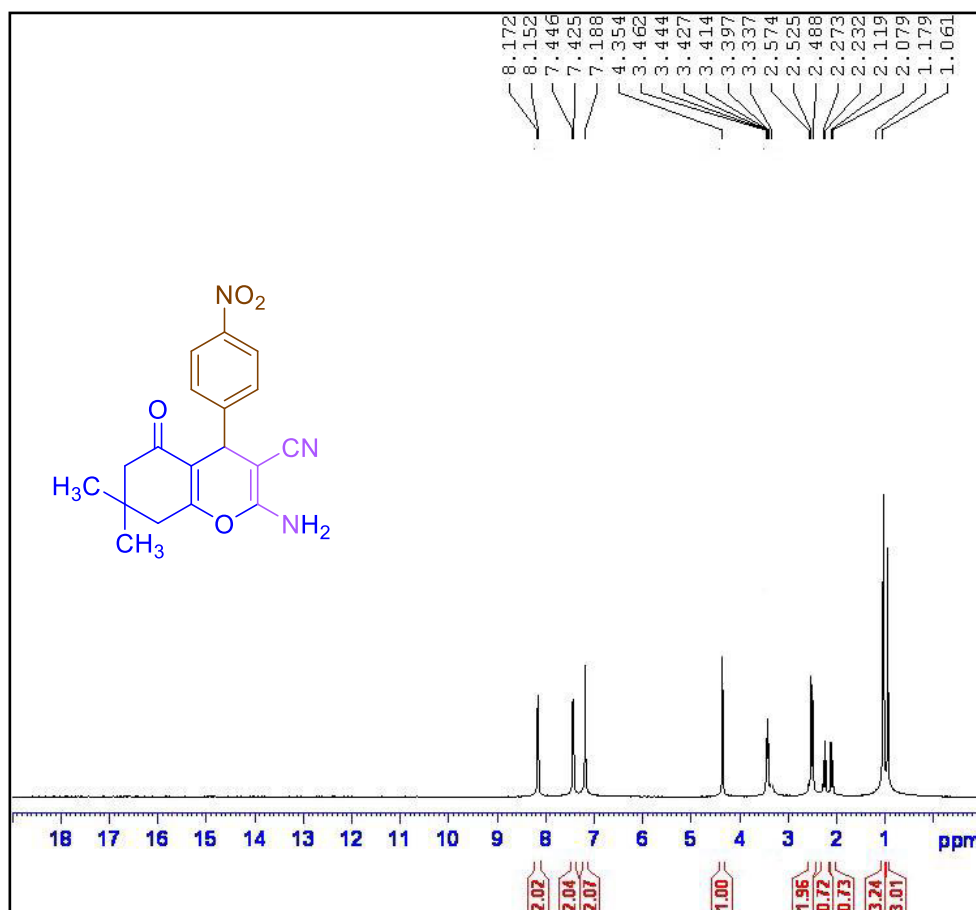

**S1.25. FT-IR spectrum of 2-amino-7,7-dimethyl-4-(3-nitrophenyl)-5-oxo-5,6,7,8-tetrahydro-4H-chromene-3-carbonitrile**

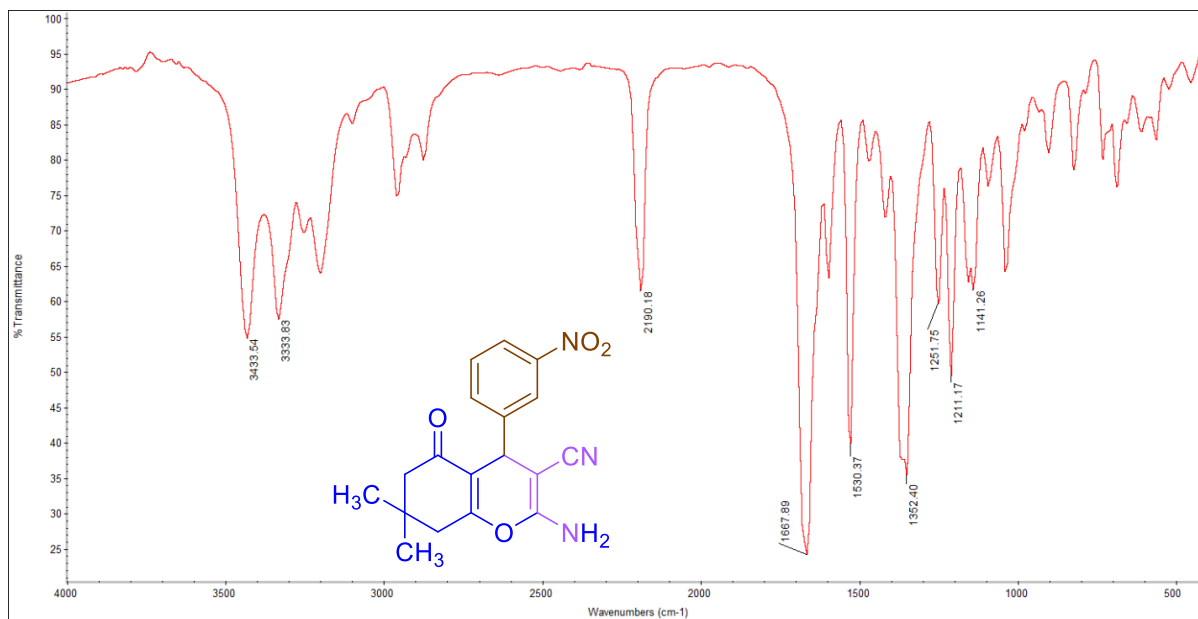

**S1.26. <sup>1</sup>H NMR (400 MHz) spectrum of 2-amino-7,7-dimethyl-4-(3-nitrophenyl)-5-oxo-5,6,7,8-tetrahydro-4H-chromene-3-carbonitrile**

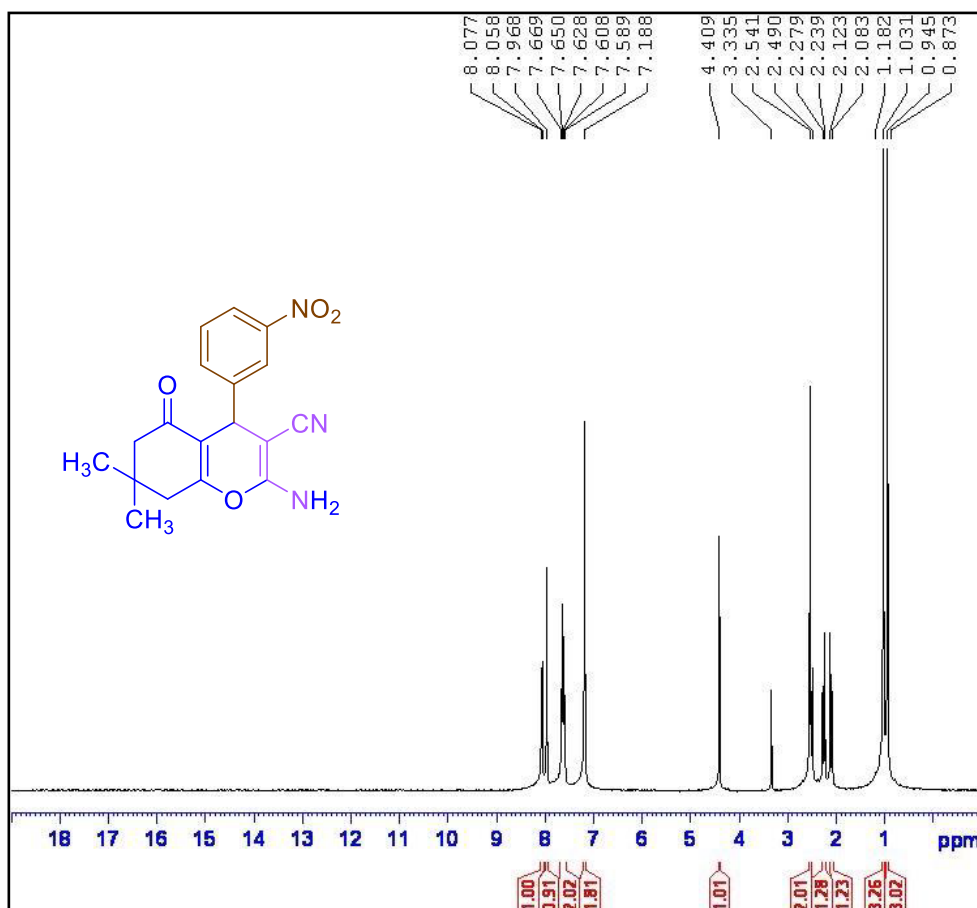

Supplement: d1ra08763k1.pdf [file d1ra08763k1.pdf]
